# Supplementary material for: Energetic derivatives substituted with trinitrophenyl: improving the sensitivity of explosives
Source: Royal Society of Chemistry journal article supplement (doi:10.1039/d4dt02070g), 2024-01-01
Supplement: d4dt02070g1.pdf [file d4dt02070g1.pdf]

## Electronic Supplementary Information

### **Energetic Derivatives Substituted with Trinitrophenyl: Improving the Sensitivity of Explosives**

Qiong Yu\*<sup>‡a</sup>, Yucong Chen<sup>‡a</sup>, Zihao Guo<sup>a</sup>, Tao Li<sup>a</sup>, Zunqi Liu<sup>a</sup>, Wenbin Yi\*<sup>a</sup>, Richard J. Staples<sup>b</sup>, Jean'ne M. Shreeve\*<sup>c</sup>

<sup>a</sup> School of Chemistry and Chemical Engineering, Nanjing University of Science and Technology, Nanjing 210094, China

<sup>b</sup> *Department of Chemistry, Michigan State University, East Lansing, Michigan 48824, USA*

<sup>c</sup> Department of Chemistry, University of Idaho, Moscow, Idaho 83844-2343, United States

<sup>‡</sup> These authors contributed equally.

#### **Table of Contents**

|                                                          |            |
|----------------------------------------------------------|------------|
| <b>1. Theoretical Calculation.....</b>                   | <b>S2</b>  |
| <b>2. Crystallographic Data.....</b>                     | <b>S4</b>  |
| <b>3. NMR and IR spectra and DSC plots of 2 – 6.....</b> | <b>S11</b> |

## Theoretical Calculations

The structures of compounds **1**, **2**, **3**, **4**, **6a** and **6b** were optimized at the M062X/def2tzvp level to obtain their stable structures on the potential energy surface, using the Gaussian 16A program.<sup>1</sup> After vibration analysis, there were no imaginary frequencies. In order to obtain the heat of gas phase formation of the compounds, their isodesmic reactions were reasonably designed (**Scheme S1**).

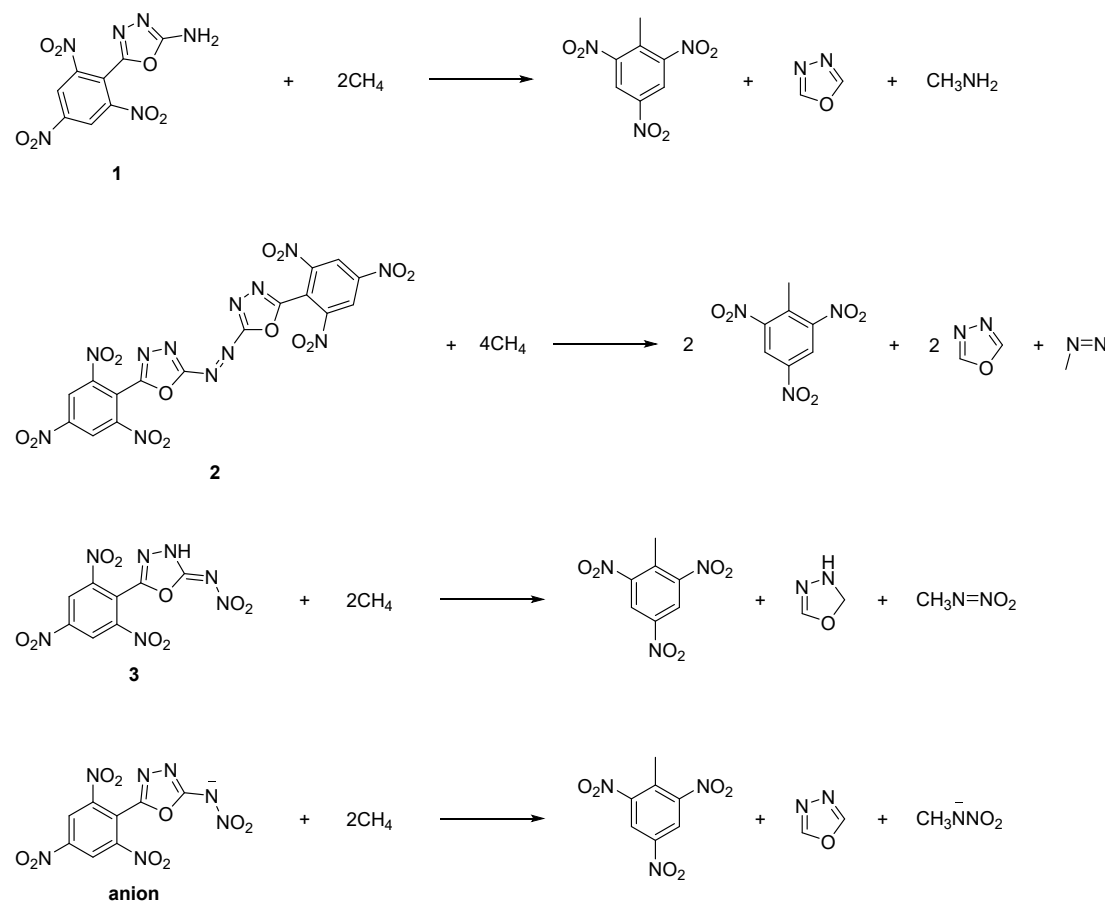

**Scheme S1.** Isodesmic reactions for the heats of formation.

Using the atomization method, the gas phase enthalpy of the constructed model molecule was calculated using the G3 ab initio algorithm.<sup>2</sup>

**Table S1.** The heats of formation (HOF) for **1**, **2**, **3** and **anion**<sup>a</sup>.

| Compounds                             | ZPE <sup>b</sup><br>(Hartree/Particle<br>) | $H_T$ <sup>c</sup><br>(Hartree/Particle<br>) | M062X/def2tzvp<br>(Hartree/Particle<br>) | HOF(gas)<br>(kJ mol <sup>-1</sup> ) |
|---------------------------------------|--------------------------------------------|----------------------------------------------|------------------------------------------|-------------------------------------|
| <b>CH<sub>4</sub></b>                 | 0.045026                                   | 0.048836                                     | -40.5002716                              | -74.9 <sup>d</sup>                  |
| <b>CH<sub>3</sub>NH<sub>2</sub></b>   | 0.064218                                   | 0.068552                                     | -95.8424359                              | -23.5 <sup>d</sup>                  |
| <b>CH<sub>2</sub>=NNO<sub>2</sub></b> | 0.067592                                   | 0.073707                                     | -300.3457738                             | 2.2                                 |
| <b>CH<sub>3</sub>N·NO<sub>2</sub></b> | 0.053614                                   | 0.059231                                     | -299.7881826                             | -99.4                               |
| <b>1</b>                              | 0.150827                                   | 0.018174                                     | -1162.0201282                            | 155.0489054                         |
| <b>2</b>                              | 0.256589                                   | 0.034995                                     | -2321.5527447                            | 666.5629524                         |
| <b>3</b>                              | 0.153523                                   | 0.020265                                     | -1366.500766                             | 222.6463686                         |
| <b>anion</b>                          | 0.139638                                   | 0.02024                                      | -1365.9961683                            | 0.174175772                         |

<sup>a</sup> The enthalpy of sublimation was calculated by using Trouton's rule. The solid-state heats of formation of the resulting compounds were calculated with Equation (1) in which  $T_m$  is the melting temperature.  $\Delta H_f = \Delta H_f(g) - \Delta H_{sub} = \Delta H_f(g) - 188[\text{J mol}^{-1} \text{K}^{-1}] \times T_m$  (1). <sup>b</sup> Zero-point correction. <sup>c</sup> Thermal correction to enthalpy, i.e.,  $H_{298.15 \text{ K}} - H_{0 \text{ K}}$ . <sup>d</sup> NIST WebBook.

## Crystallographic Data

Table S2. Crystallographic data for compounds 2 and 3.

| Compound                                       | 2                                                               | 3                                                           |
|------------------------------------------------|-----------------------------------------------------------------|-------------------------------------------------------------|
| CCDC number                                    | 2286868                                                         | 2133005                                                     |
| Formula                                        | C <sub>26</sub> H <sub>24</sub> N <sub>12</sub> O <sub>19</sub> | C <sub>8</sub> H <sub>3</sub> N <sub>7</sub> O <sub>9</sub> |
| <i>D</i> <sub>calc.</sub> / g cm <sup>-3</sup> | 1.576                                                           | 1.865                                                       |
| $\mu$ /mm <sup>-1</sup>                        | 0.137                                                           | 1.537                                                       |
| Formula Weight                                 | 808.57                                                          | 341.17                                                      |
| Colour                                         | pale yellow                                                     | colourless                                                  |
| Shape                                          | plate                                                           | plate                                                       |
| Size/mm <sup>3</sup>                           | 0.07×0.12×0.13                                                  | 0.06×0.05×0.02                                              |
| <i>T</i> /K                                    | 301.0                                                           | 100.00(10)                                                  |
| Crystal System                                 | triclinic                                                       | orthorhombic                                                |
| Space Group                                    | <i>P</i> -1                                                     | <i>Pbca</i>                                                 |
| <i>a</i> /Å                                    | 8.217(2)                                                        | 12.0361(2)                                                  |
| <i>b</i> /Å                                    | 9.115(2)                                                        | 9.5416(2)                                                   |
| <i>c</i> /Å                                    | 12.762(4)                                                       | 21.1634(4)                                                  |
| $\alpha$ <sup>°</sup>                          | 87.690(9)                                                       | 90                                                          |
| $\beta$ <sup>°</sup>                           | 75.875(9)                                                       | 90                                                          |
| $\gamma$ <sup>°</sup>                          | 67.078(6)                                                       | 90                                                          |
| <i>V</i> /Å <sup>3</sup>                       | 852.1(4)                                                        | 2430.49(9)                                                  |
| <i>Z</i>                                       | 1                                                               | 8                                                           |
| <i>Z</i> '                                     | 0.5                                                             | 1                                                           |
| Wavelength/Å                                   | 0.71073                                                         | 1.54184                                                     |
| Radiation type                                 | MoK <sub><math>\alpha</math></sub>                              | Cu K <sub><math>\alpha</math></sub>                         |
| $\theta$ <sub>min</sub> <sup>°</sup>           | 2.17                                                            | 4.178                                                       |
| $\theta$ <sub>max</sub> <sup>°</sup>           | 26.11                                                           | 77.144                                                      |
| Measured Refl's.                               | 31063                                                           | 13994                                                       |
| Indep't Refl's                                 | 3699                                                            | 2520                                                        |
| <i>R</i> <sub>int</sub>                        | 0.0883                                                          | 0.0374                                                      |
| Parameters                                     | 298                                                             | 221                                                         |
| Restraints                                     | 0                                                               | 0                                                           |
| Largest Peak                                   | 0.731                                                           | 0.204                                                       |
| Deepest Hole                                   | -0.346                                                          | -0.268                                                      |
| GooF                                           | 1.035                                                           | 1.073                                                       |
| <i>wR</i> <sub>2</sub> (all data)              | 0.1770                                                          | 0.0767                                                      |
| <i>wR</i> <sub>2</sub>                         | 0.1527                                                          | 0.0746                                                      |
| <i>R</i> <sub>1</sub> (all data)               | 0.0877                                                          | 0.0346                                                      |
| <i>R</i> <sub>1</sub>                          | 0.0579                                                          | 0.0306                                                      |

**Table S3:** Fractional Atomic Coordinates ( $\times 10^4$ ) and Equivalent Isotropic Displacement Parameters ( $\text{\AA}^2 \times 10^3$ ) for **2**.  $U_{eq}$  is defined as 1/3 of the trace of the orthogonalised  $U_{ij}$ .

| Atom | x          | y          | z         | $U_{eq}$ |
|------|------------|------------|-----------|----------|
| O1   | 3902.4(8)  | 4217.4(9)  | 4869.5(4) | 15.0(2)  |
| O2   | 2951.3(8)  | 6460.1(10) | 6613.5(4) | 16.9(2)  |
| O3   | 2863.0(8)  | 4182.9(10) | 6637.1(4) | 17.9(2)  |
| O4   | 5415.6(8)  | 1719.0(11) | 4855.1(4) | 20.8(2)  |
| O5   | 5972.9(8)  | 117.6(10)  | 4197.5(5) | 21.2(2)  |
| O6   | 5771.4(11) | 1149.2(13) | 1986.1(5) | 35.4(3)  |
| O7   | 4734.0(9)  | 2860.9(11) | 1666.5(5) | 23.9(2)  |
| O8   | 1858.9(9)  | 4505.4(12) | 3032.3(5) | 29.5(3)  |
| O9   | 2096.4(9)  | 4490.6(12) | 4042.9(5) | 27.4(3)  |
| N1   | 2984.7(9)  | 2953.0(12) | 5531.0(5) | 14.2(2)  |
| N2   | 3008.5(9)  | 2185.2(11) | 4972.7(5) | 15.0(2)  |
| N3   | 3627.4(9)  | 5333.3(11) | 5800.2(5) | 15.1(2)  |
| N4   | 3126.1(9)  | 5289.1(11) | 6371.9(5) | 13.4(2)  |
| N5   | 5440.4(9)  | 1168.4(12) | 4332.8(5) | 15.2(2)  |
| N6   | 5074.5(10) | 2065.0(12) | 2072.6(5) | 18.5(2)  |
| N7   | 2357.8(9)  | 4151.1(12) | 3507.8(5) | 16.7(2)  |
| C1   | 3495.6(10) | 4174.1(13) | 5461.7(6) | 13.4(2)  |
| C2   | 3561.3(10) | 2977.9(13) | 4603.4(6) | 13.2(2)  |
| C3   | 3902.0(10) | 2694.4(13) | 3944.9(6) | 13.3(2)  |
| C4   | 4809.7(10) | 1831.9(13) | 3814.2(6) | 13.1(2)  |
| C5   | 5188.5(10) | 1579.4(13) | 3208.0(6) | 14.4(3)  |
| C6   | 4635.8(11) | 2230.3(13) | 2719.1(6) | 14.4(3)  |
| C7   | 3700.5(11) | 3049.9(13) | 2806.6(6) | 15.1(3)  |
| C8   | 3351.7(10) | 3256.0(13) | 3422.0(6) | 14.2(3)  |

**Table S4:** Anisotropic Displacement Parameters ( $\times 10^4$ ) for **2**. The anisotropic displacement factor exponent takes the form:  $-2\pi^2[h^2a^{*2} \times U_{11} + \dots + 2hka^* \times b^* \times U_{12}]$

| Atom | $U_{11}$ | $U_{22}$ | $U_{33}$ | $U_{23}$ | $U_{13}$ | $U_{12}$ |
|------|----------|----------|----------|----------|----------|----------|
| O1   | 18.3(4)  | 15.0(4)  | 11.7(4)  | -1.4(3)  | 2.0(3)   | -2.1(3)  |
| O2   | 21.5(5)  | 13.7(4)  | 15.6(5)  | -3.0(4)  | 0.6(3)   | 1.2(4)   |
| O3   | 25.4(5)  | 14.3(5)  | 14.0(4)  | 1.9(3)   | 2.1(4)   | -2.5(4)  |
| O4   | 20.7(5)  | 30.0(5)  | 11.8(5)  | -0.8(4)  | -1.1(3)  | 2.3(4)   |
| O5   | 21.9(5)  | 19.1(5)  | 22.5(5)  | 3.0(4)   | 0.5(4)   | 7.0(4)   |
| O6   | 49.9(7)  | 35.2(6)  | 20.9(5)  | 0.7(5)   | 11.6(5)  | 23.5(6)  |
| O7   | 25.5(5)  | 31.6(6)  | 14.5(5)  | 6.7(4)   | 1.3(4)   | 3.3(4)   |
| O8   | 28.0(5)  | 43.0(7)  | 17.5(5)  | 4.9(4)   | -2.1(4)  | 17.8(5)  |
| O9   | 30.6(6)  | 35.4(6)  | 16.1(5)  | -2.9(4)  | 1.7(4)   | 16.2(5)  |
| N1   | 18.0(5)  | 14.5(5)  | 10.2(5)  | -0.9(4)  | 1.6(4)   | -0.4(4)  |
| N2   | 17.4(5)  | 16.2(5)  | 11.4(5)  | -1.5(4)  | 0.5(4)   | 1.2(4)   |

|    |         |         |         |         |         |         |
|----|---------|---------|---------|---------|---------|---------|
| N3 | 17.4(5) | 15.8(5) | 12.0(5) | -1.0(4) | 2.4(4)  | -1.1(4) |
| N4 | 14.0(5) | 14.4(5) | 11.9(5) | 0.0(4)  | -1.3(4) | -0.5(4) |
| N5 | 13.3(5) | 17.3(5) | 15.0(5) | 2.9(4)  | 0.2(4)  | -0.4(4) |
| N6 | 21.4(6) | 20.2(6) | 13.8(5) | -1.1(4) | 1.6(4)  | 0.3(4)  |
| N7 | 17.2(5) | 17.5(6) | 15.4(5) | 2.2(4)  | 0.5(4)  | 2.7(4)  |
| C1 | 13.1(5) | 15.7(6) | 11.4(6) | 1.5(5)  | 0.6(4)  | 1.1(5)  |
| C2 | 13.5(6) | 12.5(6) | 13.5(6) | -1.0(5) | -1.2(4) | 1.3(4)  |
| C3 | 14.7(6) | 12.6(6) | 12.7(6) | -0.6(5) | 0.3(4)  | -2.8(5) |
| C4 | 14.0(6) | 12.6(6) | 12.7(6) | 1.4(5)  | -2.2(4) | -1.5(4) |
| C5 | 13.9(6) | 13.0(6) | 16.3(6) | -0.7(5) | 0.3(5)  | -1.0(5) |
| C6 | 17.4(6) | 13.6(6) | 12.4(6) | -2.1(5) | 2.0(5)  | -2.3(5) |
| C7 | 17.0(6) | 14.2(6) | 14.3(6) | 1.4(5)  | -1.6(5) | -1.7(5) |
| C8 | 14.6(6) | 12.4(6) | 15.6(6) | 0.3(5)  | 0.1(5)  | 0.3(5)  |

**Table S5:** Bond Lengths in Å for **2**.

| Atom | Atom | Length/Å | Atom | Atom | Length/Å  |
|------|------|----------|------|------|-----------|
| O1   | C1   | 1.349(3) | C10  | C16  | 1.373(3)  |
| O1   | C6   | 1.355(3) | C12  | C14  | 1.389(3)  |
| N1   | N1   | 1.256(4) | C12  | C16  | 1.379(3)  |
| N1   | C6   | 1.387(3) | C2   | C9   | 1.440(5)  |
| O4   | N4   | 1.220(3) | C9   | C2   | 1.440(5)  |
| O6   | N4   | 1.211(3) | O2   | C5   | 1.461(17) |
| N4   | C10  | 1.471(3) | O2   | C11  | 1.46(2)   |
| O8   | C2   | 1.418(4) | O2   | C13  | 1.54(2)   |
| O8   | C9   | 1.406(4) | O2   | C7   | 1.58(2)   |
| O10  | N6   | 1.204(3) | C5   | C11  | 1.505(13) |
| N6   | O3   | 1.204(3) | C5   | C7   | 1.223(11) |
| N6   | C8   | 1.478(3) | C5   | O5   | 1.56(2)   |
| N3   | O11  | 1.203(3) | C11  | C5   | 1.505(13) |
| N3   | O7   | 1.204(3) | C11  | C13  | 1.231(12) |
| N3   | C12  | 1.470(3) | C11  | O5   | 1.60(2)   |
| N2   | N5   | 1.399(3) | O9   | C3   | 1.416(11) |
| N2   | C1   | 1.277(3) | O9   | C15  | 1.446(12) |
| N5   | C6   | 1.281(3) | C3   | C7   | 1.508(12) |
| C1   | C14  | 1.481(3) | C13  | C15  | 1.477(13) |
| C4   | C8   | 1.376(3) | C13  | O5   | 1.40(2)   |
| C4   | C10  | 1.372(3) | C7   | O5   | 1.39(2)   |
| C8   | C14  | 1.391(3) |      |      |           |

**Table S6:** Bond Angles in ° for **2**.

| Atom | Atom | Atom | Angle/°    | Atom | Atom | Atom | Angle/°   |
|------|------|------|------------|------|------|------|-----------|
| C1   | O1   | C6   | 101.09(18) | C5   | O2   | C7   | 47.3(6)   |
| N1   | N1   | C6   | 112.9(2)   | C11  | O2   | C13  | 48.4(7)   |
| O4   | N4   | C10  | 117.5(2)   | C11  | O2   | C7   | 114.3(10) |
| O6   | N4   | O4   | 124.9(2)   | C13  | O2   | C7   | 96.1(12)  |
| O6   | N4   | C10  | 117.6(2)   | O2   | C5   | C11  | 111.8(11) |
| C9   | O8   | C2   | 110.5(3)   | O2   | C5   | O5   | 13.0(16)  |
| O10  | N6   | O3   | 124.5(2)   | C11  | C5   | O5   | 124.5(10) |

|     |     |     |           |     |     |     |           |
|-----|-----|-----|-----------|-----|-----|-----|-----------|
| O10 | N6  | C8  | 117.4(2)  | C7  | C5  | O2  | 71.4(11)  |
| O3  | N6  | C8  | 118.0(2)  | C7  | C5  | C11 | 168.7(9)  |
| O11 | N3  | O7  | 123.7(2)  | C7  | C5  | O5  | 58.4(10)  |
| O11 | N3  | C12 | 117.9(2)  | O2  | C11 | C5  | 112.2(11) |
| O7  | N3  | C12 | 118.4(2)  | O2  | C11 | O5  | 12.3(16)  |
| C1  | N2  | N5  | 105.7(2)  | C5  | C11 | O5  | 123.9(10) |
| C6  | N5  | N2  | 105.5(2)  | C13 | C11 | O2  | 68.8(10)  |
| O1  | C1  | C14 | 119.4(2)  | C13 | C11 | C5  | 176.3(9)  |
| N2  | C1  | O1  | 114.0(2)  | C13 | C11 | O5  | 57.4(10)  |
| N2  | C1  | C14 | 126.6(2)  | C3  | O9  | C15 | 110.5(6)  |
| C10 | C4  | C8  | 116.7(2)  | O9  | C3  | C7  | 110.7(7)  |
| O1  | C6  | N1  | 122.3(2)  | C11 | C13 | O2  | 62.8(9)   |
| N5  | C6  | O1  | 113.7(2)  | C11 | C13 | C15 | 161.3(9)  |
| N5  | C6  | N1  | 124.0(2)  | C11 | C13 | O5  | 74.8(11)  |
| C4  | C8  | N6  | 116.5(2)  | C15 | C13 | O2  | 124.6(11) |
| C4  | C8  | C14 | 123.9(2)  | O5  | C13 | O2  | 12.9(17)  |
| C14 | C8  | N6  | 119.6(2)  | O5  | C13 | C15 | 111.7(12) |
| C4  | C10 | N4  | 119.2(2)  | C5  | C7  | O2  | 61.3(9)   |
| C4  | C10 | C16 | 123.1(2)  | C5  | C7  | C3  | 172.2(8)  |
| C16 | C10 | N4  | 117.7(2)  | C5  | C7  | O5  | 73.0(11)  |
| C14 | C12 | N3  | 120.6(2)  | C3  | C7  | O2  | 124.8(10) |
| C16 | C12 | N3  | 116.6(2)  | O5  | C7  | O2  | 11.7(16)  |
| C16 | C12 | C14 | 122.8(2)  | O5  | C7  | C3  | 113.2(12) |
| C8  | C14 | C1  | 121.3(2)  | O9  | C15 | C13 | 111.1(7)  |
| C12 | C14 | C1  | 122.9(2)  | C5  | O5  | C11 | 93.9(12)  |
| C12 | C14 | C8  | 115.7(2)  | C13 | O5  | C5  | 128.4(14) |
| C10 | C16 | C12 | 117.7(2)  | C13 | O5  | C11 | 47.8(9)   |
| O8  | C2  | C9  | 113.5(3)  | C7  | O5  | C5  | 48.6(8)   |
| O8  | C9  | C2  | 112.5(3)  | C7  | O5  | C11 | 117.3(13) |
| C5  | O2  | C11 | 104.4(9)  | C7  | O5  | C13 | 112.3(15) |
| C5  | O2  | C13 | 125.6(11) |     |     |     |           |

**Table S7:** Torsion Angles in ° for **2**

| Atom | Atom | Atom | Atom | Angle/°   | Atom | Atom | Atom | Atom | Angle/°    |
|------|------|------|------|-----------|------|------|------|------|------------|
| O1   | C1   | C14  | C8   | -97.0(3)  | C5   | O2   | C11  | C13  | -125.1(14) |
| O1   | C1   | C14  | C12  | 86.5(3)   | C5   | O2   | C11  | O5   | -105(5)    |
| N1   | N1   | C6   | O1   | 1.2(4)    | C5   | O2   | C13  | C11  | 76.9(17)   |
| N1   | N1   | C6   | N5   | -179.2(3) | C5   | O2   | C13  | C15  | -83.0(19)  |
| O4   | N4   | C10  | C4   | -21.8(3)  | C5   | O2   | C13  | O5   | -81(5)     |
| O4   | N4   | C10  | C16  | 157.8(2)  | C5   | O2   | C7   | C3   | 174.3(11)  |
| O6   | N4   | C10  | C4   | 158.7(2)  | C5   | O2   | C7   | O5   | -180(8)    |

|     |     |     |     |           |     |     |     |     |            |
|-----|-----|-----|-----|-----------|-----|-----|-----|-----|------------|
| O6  | N4  | C10 | C16 | -21.7(3)  | C5  | C11 | O5  | C5  | 43.1(15)   |
| N4  | C10 | C16 | C12 | 179.9(2)  | C5  | C11 | O5  | C13 | -175.8(11) |
| O10 | N6  | C8  | C4  | 28.3(3)   | C5  | C11 | O5  | C7  | 87.9(18)   |
| O10 | N6  | C8  | C14 | -152.2(3) | C5  | C7  | O5  | C11 | -69.5(15)  |
| N6  | C8  | C14 | C1  | 4.0(3)    | C5  | C7  | O5  | C13 | -122.2(17) |
| N6  | C8  | C14 | C12 | -179.3(2) | C11 | O2  | C5  | C11 | -58.5(15)  |
| N3  | C12 | C14 | C1  | -3.5(4)   | C11 | O2  | C5  | C7  | 109.9(13)  |
| N3  | C12 | C14 | C8  | 179.8(2)  | C11 | O2  | C5  | O5  | 110(7)     |
| N3  | C12 | C16 | C10 | -179.7(2) | C11 | O2  | C13 | C15 | -159.9(11) |
| O11 | N3  | C12 | C14 | 174.0(3)  | C11 | O2  | C13 | O5  | -158(5)    |
| O11 | N3  | C12 | C16 | -7.3(4)   | C11 | O2  | C7  | C5  | -87.4(13)  |
| N2  | N5  | C6  | O1  | -0.3(3)   | C11 | O2  | C7  | C3  | 86.9(14)   |
| N2  | N5  | C6  | N1  | -179.9(2) | C11 | O2  | C7  | O5  | 93(8)      |
| N2  | C1  | C14 | C8  | 82.6(3)   | C11 | C5  | C7  | O2  | 108(4)     |
| N2  | C1  | C14 | C12 | -94.0(3)  | C11 | C5  | C7  | O5  | 108(4)     |
| O3  | N6  | C8  | C4  | -153.4(3) | C11 | C5  | O5  | C11 | -43.5(15)  |
| O3  | N6  | C8  | C14 | 26.1(4)   | C11 | C5  | O5  | C13 | -80(2)     |
| N5  | N2  | C1  | O1  | -0.6(3)   | C11 | C5  | O5  | C7  | -167.0(11) |
| N5  | N2  | C1  | C14 | 179.8(2)  | C11 | C13 | C15 | O9  | -51(3)     |
| C1  | O1  | C6  | N1  | 179.6(2)  | C11 | C13 | O5  | C5  | 53.1(19)   |
| C1  | O1  | C6  | N5  | -0.1(3)   | C11 | C13 | O5  | C7  | 107.2(16)  |
| C1  | N2  | N5  | C6  | 0.5(3)    | O9  | C3  | C7  | O2  | -51.6(13)  |
| O7  | N3  | C12 | C14 | -5.8(4)   | O9  | C3  | C7  | O5  | -52.9(13)  |
| O7  | N3  | C12 | C16 | 172.9(3)  | C3  | O9  | C15 | C13 | -56.3(8)   |
| C4  | C8  | C14 | C1  | -176.7(2) | C3  | C7  | O5  | C5  | 175.0(10)  |
| C4  | C8  | C14 | C12 | 0.1(3)    | C3  | C7  | O5  | C11 | 105.5(16)  |
| C4  | C10 | C16 | C12 | -0.6(4)   | C3  | C7  | O5  | C13 | 52.7(18)   |
| C6  | O1  | C1  | N2  | 0.5(3)    | C13 | O2  | C5  | C11 | -107.3(18) |
| C6  | O1  | C1  | C14 | -179.9(2) | C13 | O2  | C5  | C7  | 61.2(17)   |
| C8  | C4  | C10 | N4  | -178.7(2) | C13 | O2  | C5  | O5  | 61(6)      |
| C8  | C4  | C10 | C16 | 1.7(4)    | C13 | O2  | C11 | C5  | -176.1(10) |
| C10 | C4  | C8  | N6  | 177.9(2)  | C13 | O2  | C11 | O5  | 20(5)      |
| C10 | C4  | C8  | C14 | -1.5(4)   | C13 | O2  | C7  | C5  | -134.2(11) |
| C14 | C12 | C16 | C10 | -1.0(4)   | C13 | O2  | C7  | C3  | 40.1(13)   |
| C16 | C12 | C14 | C1  | 177.9(2)  | C13 | O2  | C7  | O5  | 46(7)      |
| C16 | C12 | C14 | C8  | 1.2(3)    | C13 | C11 | O5  | C5  | -141.1(13) |
| C2  | O8  | C9  | C2  | -52.0(5)  | C13 | C11 | O5  | C7  | -96.3(18)  |
| C9  | O8  | C2  | C9  | 52.6(5)   | C7  | O2  | C5  | C11 | -168.4(9)  |
| O2  | C5  | C7  | O5  | 0.0(16)   | C7  | O2  | C5  | O5  | 0(6)       |
| O2  | C5  | O5  | C11 | -56(6)    | C7  | O2  | C11 | C5  | 108.1(13)  |
| O2  | C5  | O5  | C13 | -93(7)    | C7  | O2  | C11 | C13 | -75.8(14)  |
| O2  | C5  | O5  | C7  | -180(7)   | C7  | O2  | C11 | O5  | -56(5)     |
| O2  | C11 | C13 | C15 | 118(3)    | C7  | O2  | C13 | C11 | 117.3(9)   |
| O2  | C11 | C13 | O5  | 5.0(13)   | C7  | O2  | C13 | C15 | -42.6(11)  |
| O2  | C11 | O5  | C5  | 62(5)     | C7  | O2  | C13 | O5  | -40(5)     |
| O2  | C11 | O5  | C13 | -157(6)   | C7  | C5  | O5  | C11 | 123.4(13)  |
| O2  | C11 | O5  | C7  | 106(6)    | C7  | C5  | O5  | C13 | 87(2)      |
| O2  | C13 | C15 | O9  | 56.6(11)  | C15 | O9  | C3  | C7  | 53.7(8)    |
| O2  | C13 | O5  | C5  | 74(5)     | C15 | C13 | O5  | C5  | -108(2)    |
| O2  | C13 | O5  | C11 | 20(5)     | C15 | C13 | O5  | C11 | -161.5(10) |
| O2  | C13 | O5  | C7  | 128(6)    | C15 | C13 | O5  | C7  | -54.3(18)  |
| O2  | C7  | O5  | C5  | 0(7)      | O5  | C5  | C7  | O2  | 0.0(16)    |
| O2  | C7  | O5  | C11 | -69(7)    | O5  | C11 | C13 | O2  | -5.0(13)   |
| O2  | C7  | O5  | C13 | -122(8)   | O5  | C11 | C13 | C15 | 113(3)     |



|    |    |     |    |          |    |     |     |    |          |
|----|----|-----|----|----------|----|-----|-----|----|----------|
| C5 | O2 | C11 | C5 | 58.8(15) | O5 | C13 | C15 | O9 | 56.0(12) |
|----|----|-----|----|----------|----|-----|-----|----|----------|

**Table S8:** Bond Lengths in Å for **3**.

| Atom | Atom | Length/Å   | Atom | Atom | Length/Å   |
|------|------|------------|------|------|------------|
| O1   | C1   | 1.3460(15) | N3   | N4   | 1.3527(15) |
| O1   | C2   | 1.3727(15) | N3   | C1   | 1.3274(17) |
| O2   | N4   | 1.2466(14) | N5   | C4   | 1.4770(16) |
| O3   | N4   | 1.2367(14) | N6   | C6   | 1.4750(16) |
| O4   | N5   | 1.2242(15) | N7   | C8   | 1.4810(16) |
| O5   | N5   | 1.2239(15) | C2   | C3   | 1.4778(17) |
| O6   | N6   | 1.2250(16) | C3   | C4   | 1.3954(18) |
| O7   | N6   | 1.2179(15) | C3   | C8   | 1.3966(18) |
| O8   | N7   | 1.2196(15) | C4   | C5   | 1.3828(18) |
| O9   | N7   | 1.2192(15) | C5   | C6   | 1.3780(18) |
| N1   | N2   | 1.3905(15) | C6   | C7   | 1.3832(18) |
| N1   | C1   | 1.3256(17) | C7   | C8   | 1.3823(18) |
| N2   | C2   | 1.2750(17) |      |      |            |

**Table S9:** Bond Angles in ° for **3**.

| Atom | Atom | Atom | Angle/°    | Atom | Atom | Atom | Angle/°    |
|------|------|------|------------|------|------|------|------------|
| C1   | O1   | C2   | 104.28(10) | N3   | C1   | O1   | 115.69(11) |
| C1   | N1   | N2   | 111.07(10) | O1   | C2   | C3   | 117.49(11) |
| C2   | N2   | N1   | 102.65(10) | N2   | C2   | O1   | 114.57(11) |
| C1   | N3   | N4   | 113.80(10) | N2   | C2   | C3   | 127.90(12) |
| O2   | N4   | N3   | 114.47(10) | C4   | C3   | C2   | 120.80(11) |
| O3   | N4   | O2   | 122.39(10) | C4   | C3   | C8   | 116.14(11) |
| O3   | N4   | N3   | 123.15(11) | C8   | C3   | C2   | 123.06(11) |
| O4   | N5   | C4   | 118.32(11) | C3   | C4   | N5   | 120.53(11) |
| O5   | N5   | O4   | 125.14(11) | C5   | C4   | N5   | 116.44(11) |
| O5   | N5   | C4   | 116.51(11) | C5   | C4   | C3   | 123.01(12) |
| O6   | N6   | C6   | 117.38(11) | C6   | C5   | C4   | 117.32(12) |
| O7   | N6   | O6   | 124.74(12) | C5   | C6   | N6   | 118.39(11) |
| O7   | N6   | C6   | 117.87(11) | C7   | C6   | N6   | 118.43(11) |
| O8   | N7   | O9   | 124.45(11) | C7   | C6   | C5   | 123.17(12) |
| O8   | N7   | C8   | 117.15(11) | C6   | C7   | C8   | 116.99(12) |
| O9   | N7   | C8   | 118.40(11) | C3   | C8   | N7   | 120.47(11) |
| N1   | C1   | O1   | 107.39(11) | C7   | C8   | N7   | 116.29(11) |
| N1   | C1   | N3   | 136.73(12) | C7   | C8   | C3   | 123.22(12) |

**Table S10:** Torsion Angles in ° for **3**

| Atom | Atom | Atom | Atom | Angle/°    | Atom | Atom | Atom | Atom | Angle/°     |
|------|------|------|------|------------|------|------|------|------|-------------|
| O1   | C2   | C3   | C4   | 98.97(14)  | N6   | C6   | C7   | C8   | -176.03(11) |
| O1   | C2   | C3   | C8   | -81.06(15) | C1   | O1   | C2   | N2   | 98.97(14)   |
| O4   | N5   | C4   | C3   | -24.13(17) | C1   | O1   | C2   | C3   | -81.06(15)  |
| O4   | N5   | C4   | C5   | 154.14(12) | C1   | N1   | N2   | C2   | -24.13(17)  |

|    |    |    |    |             |    |    |    |    |             |
|----|----|----|----|-------------|----|----|----|----|-------------|
| O5 | N5 | C4 | C3 | 157.61(11)  | C1 | N3 | N4 | O2 | 154.14(12)  |
| O5 | N5 | C4 | C5 | -24.12(16)  | C1 | N3 | N4 | O3 | 157.61(11)  |
| O6 | N6 | C6 | C5 | 13.80(18)   | C2 | O1 | C1 | N1 | -24.12(16)  |
| O6 | N6 | C6 | C7 | -167.25(13) | C2 | O1 | C1 | N3 | 13.80(18)   |
| O7 | N6 | C6 | C5 | -164.97(12) | C2 | C3 | C4 | N5 | -167.25(13) |
| O7 | N6 | C6 | C7 | 13.98(18)   | C2 | C3 | C4 | C5 | -164.97(12) |
| O8 | N7 | C8 | C3 | -173.66(12) | C2 | C3 | C8 | N7 | 13.98(18)   |
| O8 | N7 | C8 | C7 | 7.78(17)    | C2 | C3 | C8 | C7 | -173.66(12) |
| O9 | N7 | C8 | C3 | 6.77(18)    | C3 | C4 | C5 | C6 | 7.78(17)    |
| O9 | N7 | C8 | C7 | -171.80(12) | C4 | C3 | C8 | N7 | 6.77(18)    |
| N1 | N2 | C2 | O1 | -0.38(14)   | C4 | C3 | C8 | C7 | -171.80(12) |
| N1 | N2 | C2 | C3 | 177.21(12)  | C4 | C5 | C6 | N6 | -0.38(14)   |
| N2 | N1 | C1 | O1 | -2.34(14)   | C4 | C5 | C6 | C7 | 177.21(12)  |
| N2 | N1 | C1 | N3 | 172.03(14)  | C5 | C6 | C7 | C8 | -2.34(14)   |
| N2 | C2 | C3 | C4 | -78.56(17)  | C6 | C7 | C8 | N7 | 172.03(14)  |
| N2 | C2 | C3 | C8 | 101.41(17)  | C6 | C7 | C8 | C3 | -78.56(17)  |
| N4 | N3 | C1 | O1 | 174.71(10)  | C8 | C3 | C4 | N5 | 101.41(17)  |
| N4 | N3 | C1 | N1 | 0.7(2)      | C8 | C3 | C4 | C5 | 174.71(10)  |
| N5 | C4 | C5 | C6 | -177.70(11) |    |    |    |    |             |

---

# NMR and IR spectra and DSC plots of 2-6

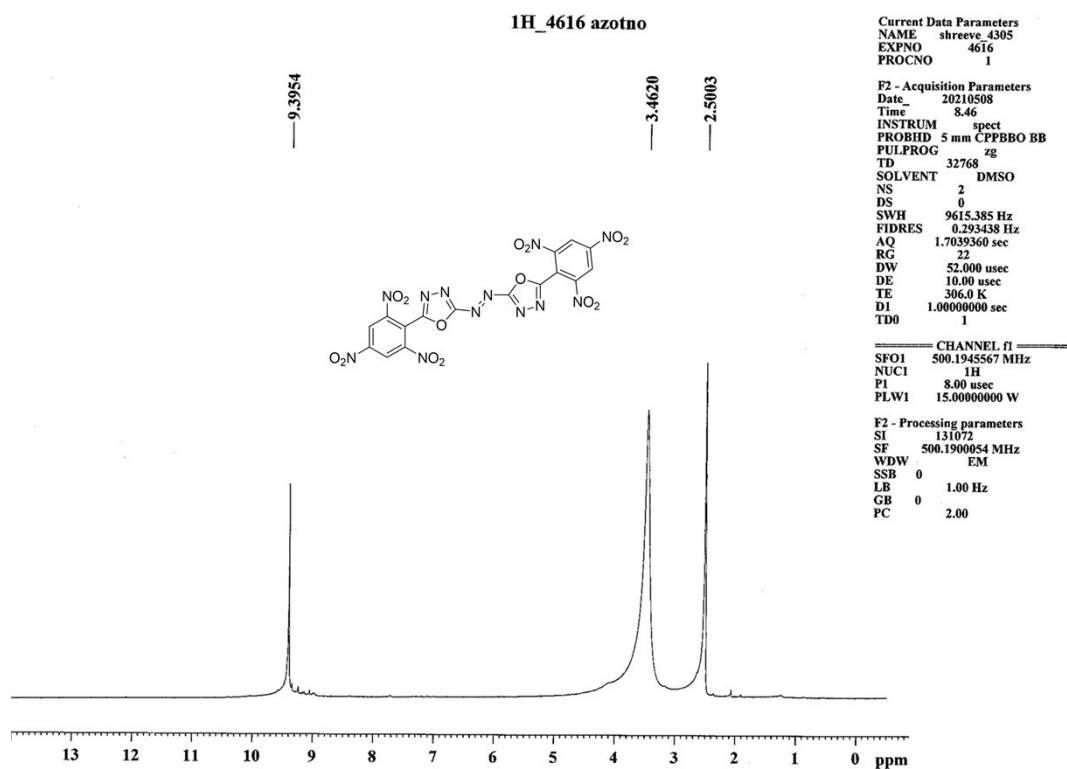

Figure S1 <sup>1</sup>H-NMR spectrum of 2 in *d*<sub>6</sub>-DMSO.

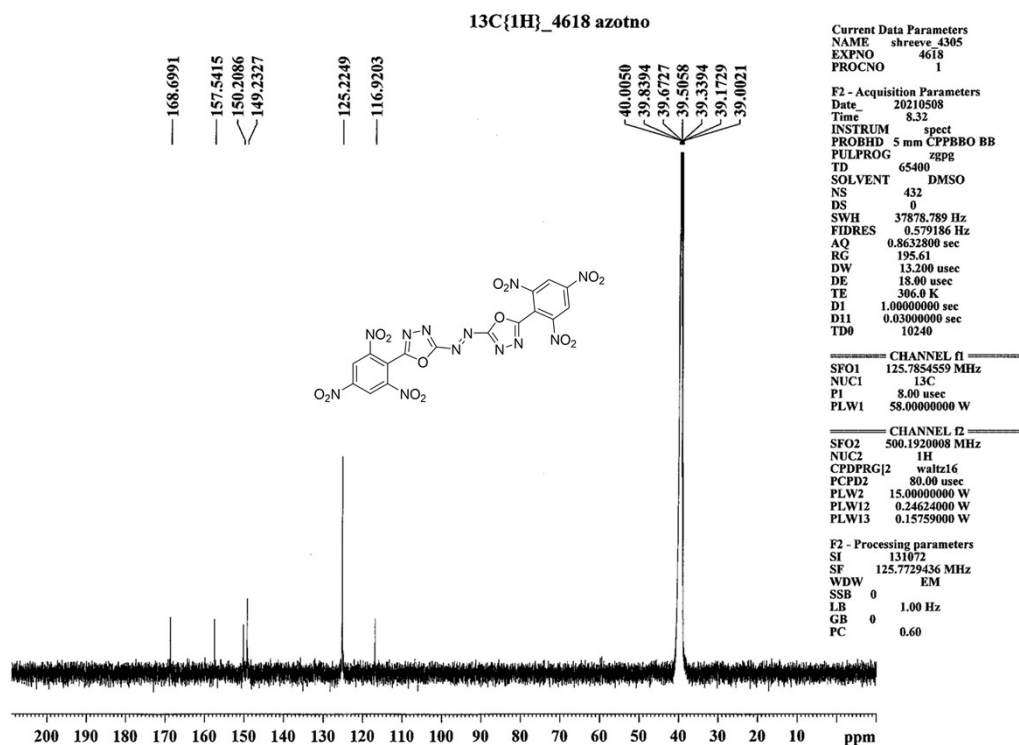

Figure S2 <sup>13</sup>C-NMR spectrum of 2 in *d*<sub>6</sub>-DMSO.

Sample: azotno  
 Size: 0.2000 mg  
 Method: Ramp  
 Comment: Cell constant calibration

DSC

File: C:\...trinitro toluene\azotno 2.001  
 Operator: qiong  
 Run Date: 06-May-2021 10:48  
 Instrument: DSC Q2000 V24.11 Build 124

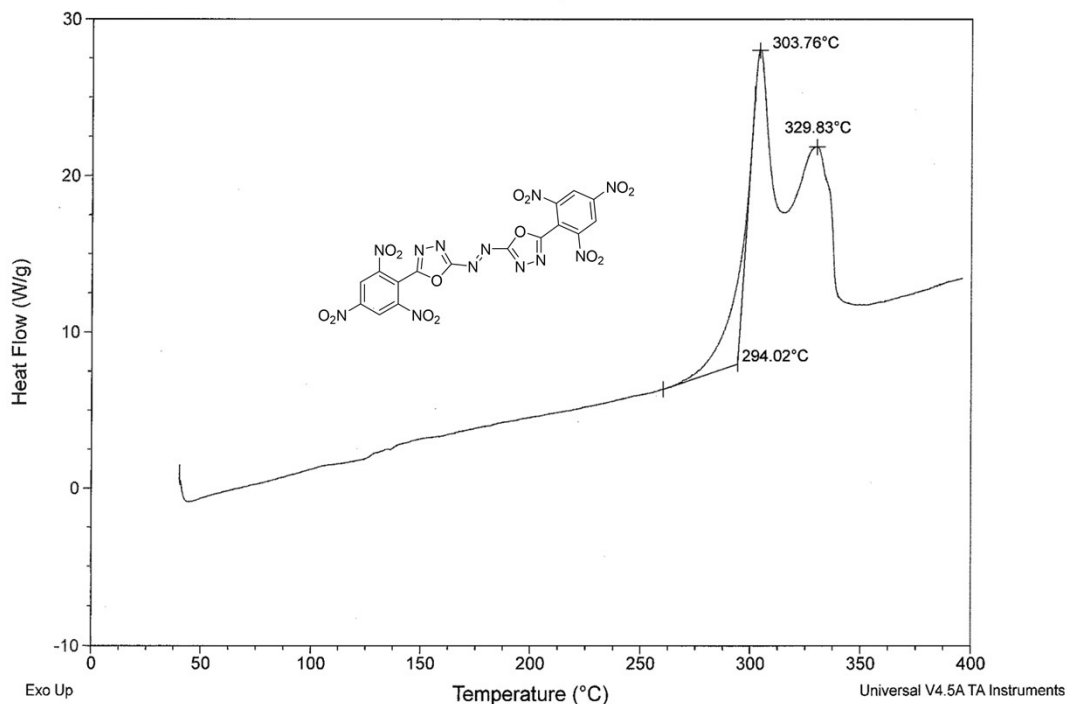

Figure S3 DSC plot of 2.

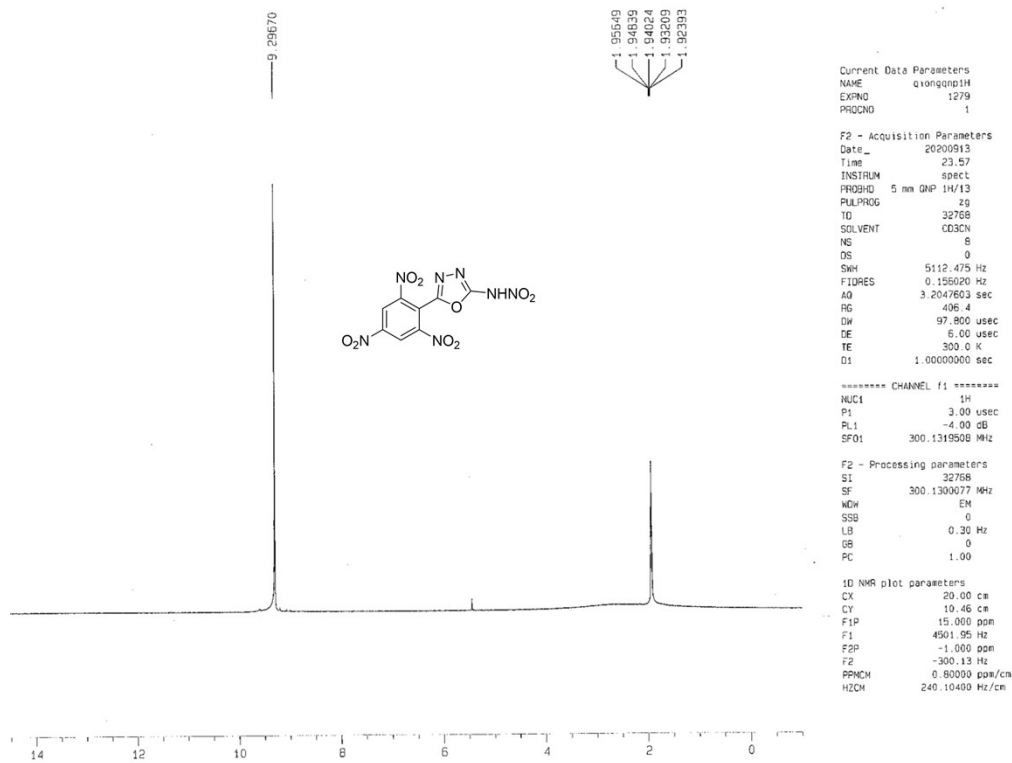

Figure S4 <sup>1</sup>H-NMR spectrum of 3 in CD<sub>3</sub>CN.

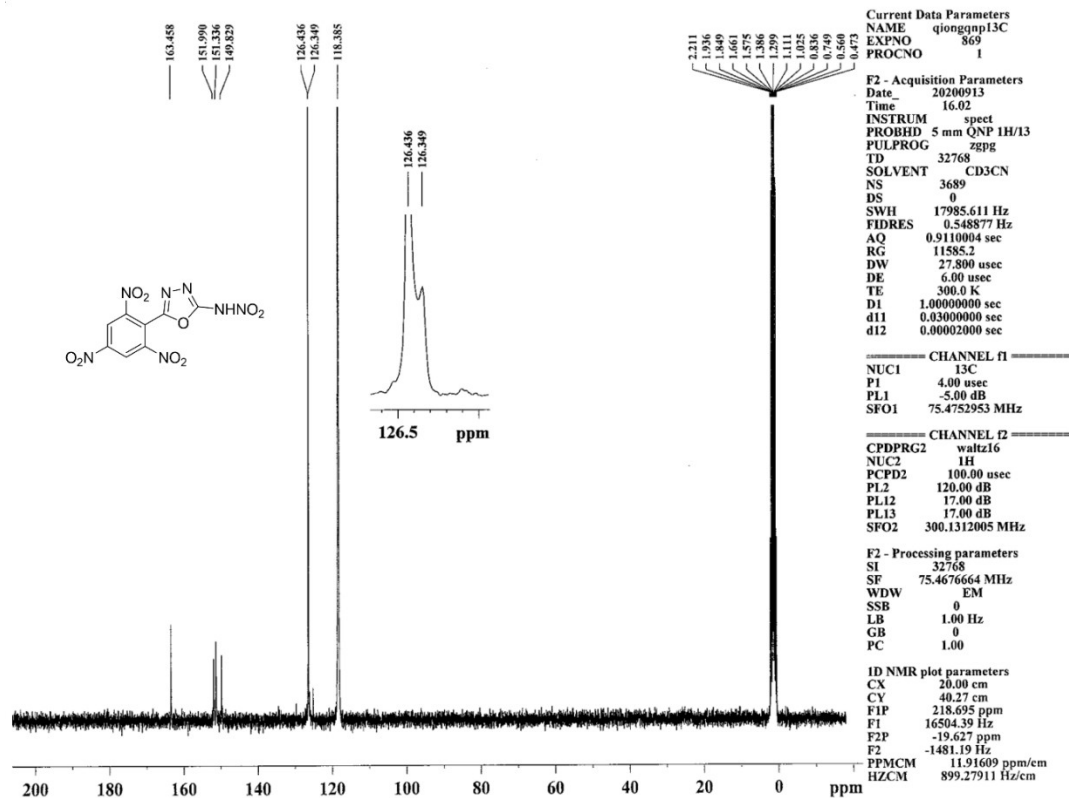

Figure S5  $^{13}\text{C}$ -NMR spectrum of **3** in  $\text{CD}_3\text{CN}$ .

Sample: tnona  
 Size: 0.6000 mg  
 Method: Ramp  
 Comment: Cell constant calibration

DSC

File: C:\...trinitro toluene\tnona brown.001  
 Operator: qiong  
 Run Date: 13-Sep-2020 15:50  
 Instrument: DSC Q2000 V24.11 Build 124

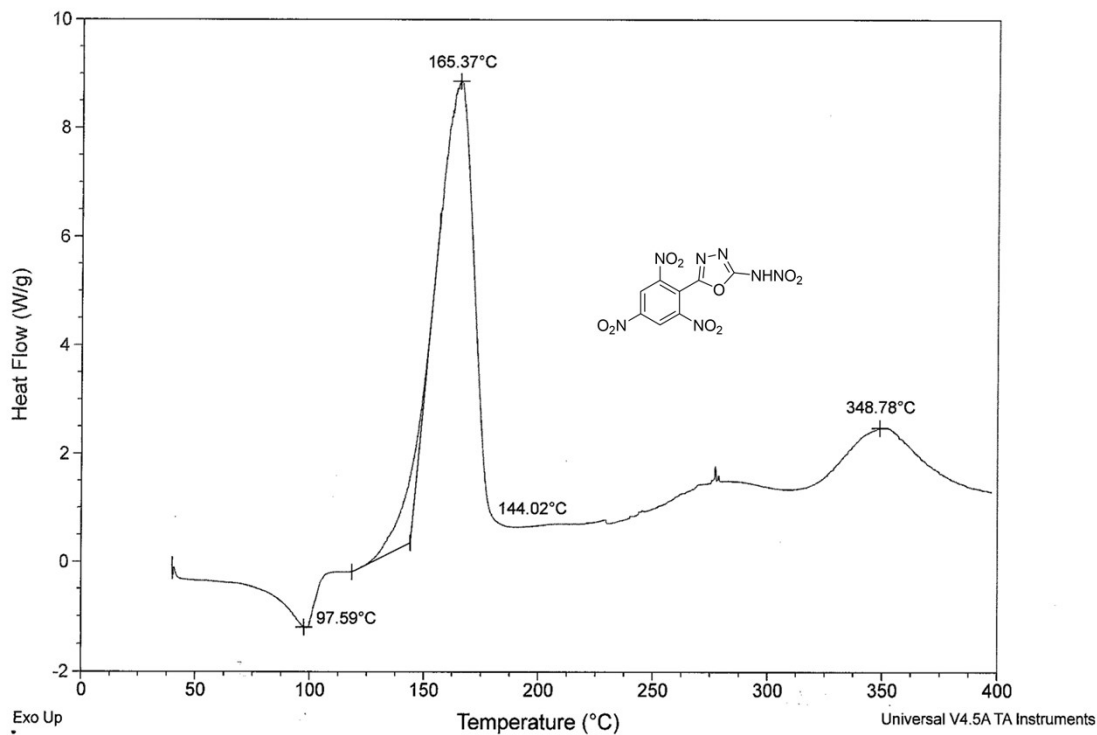

Figure S6 DSC plot of **3**.

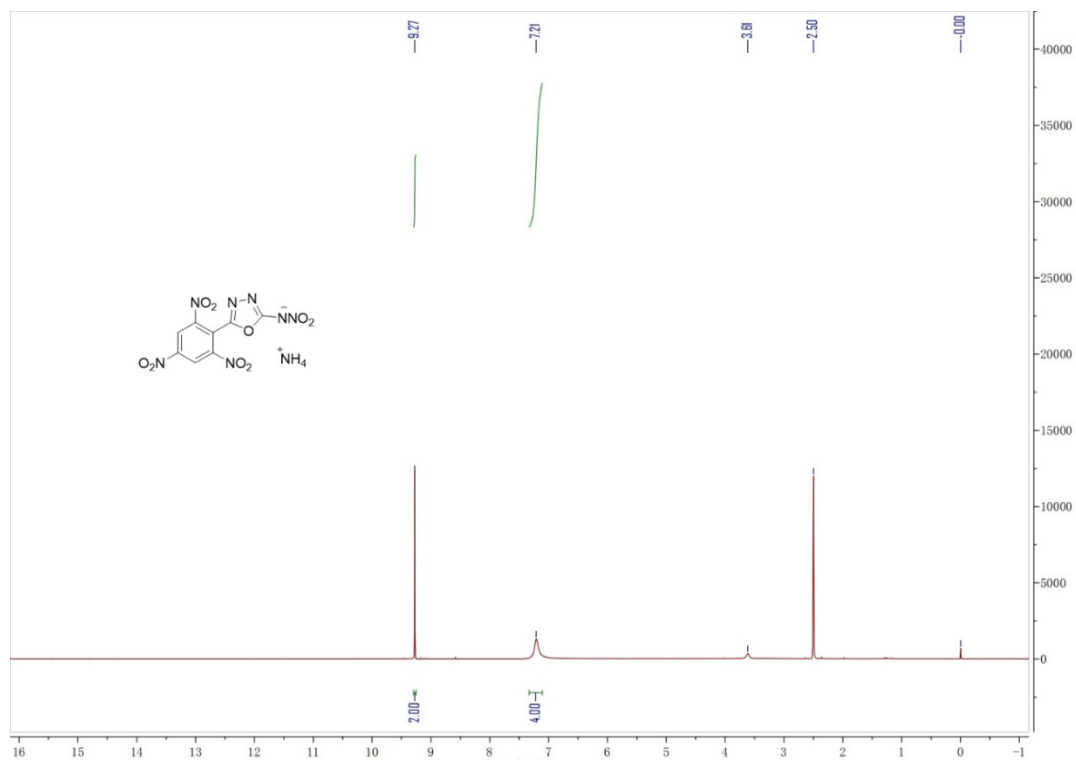

Figure S7  $^1\text{H}$ -NMR spectrum of 4 in  $d_6$ -DMSO.

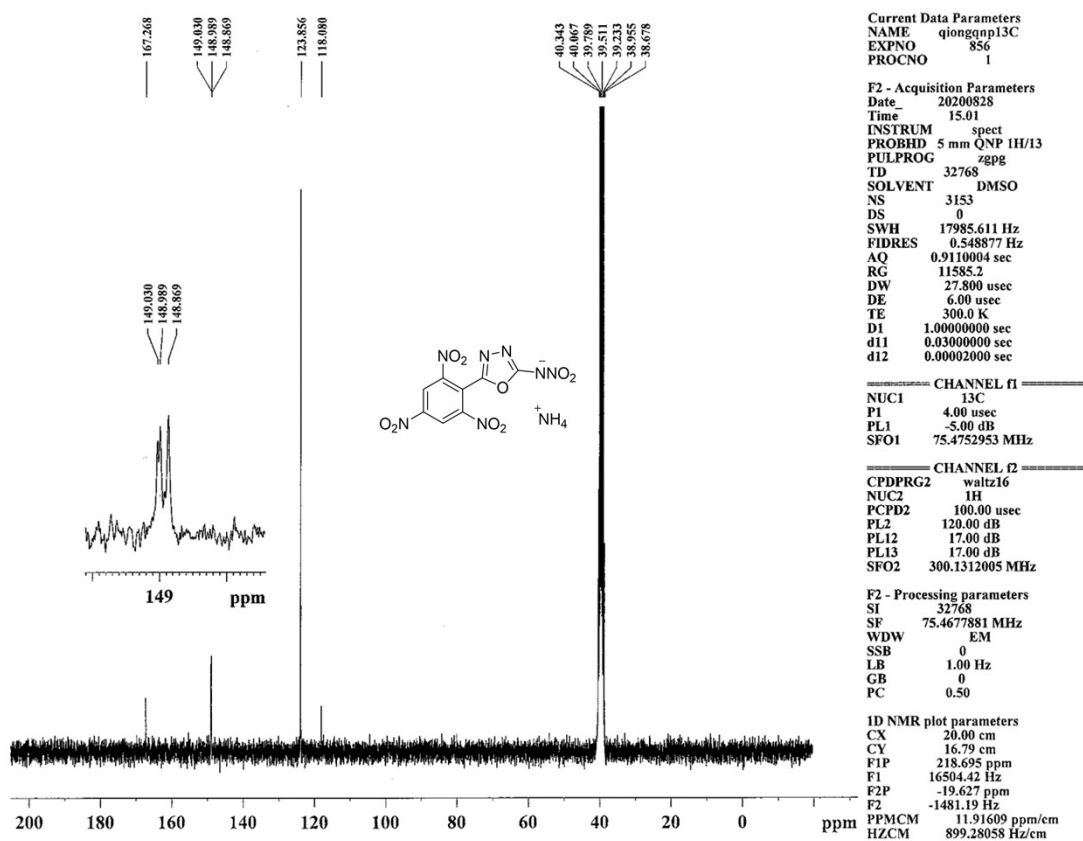

Figure S8  $^{13}\text{C}$ -NMR spectrum of 4 in  $d_6$ -DMSO.

Sample: nh4 natro  
Size: 0.8000 mg  
Method: Ramp  
Comment: Cell constant calibration

DSC

File: C:\...trinitro toluene\nh4 natro.001  
Operator: qiong  
Run Date: 28-Aug-2020 19:33  
Instrument: DSC Q2000 V24.11 Build 124

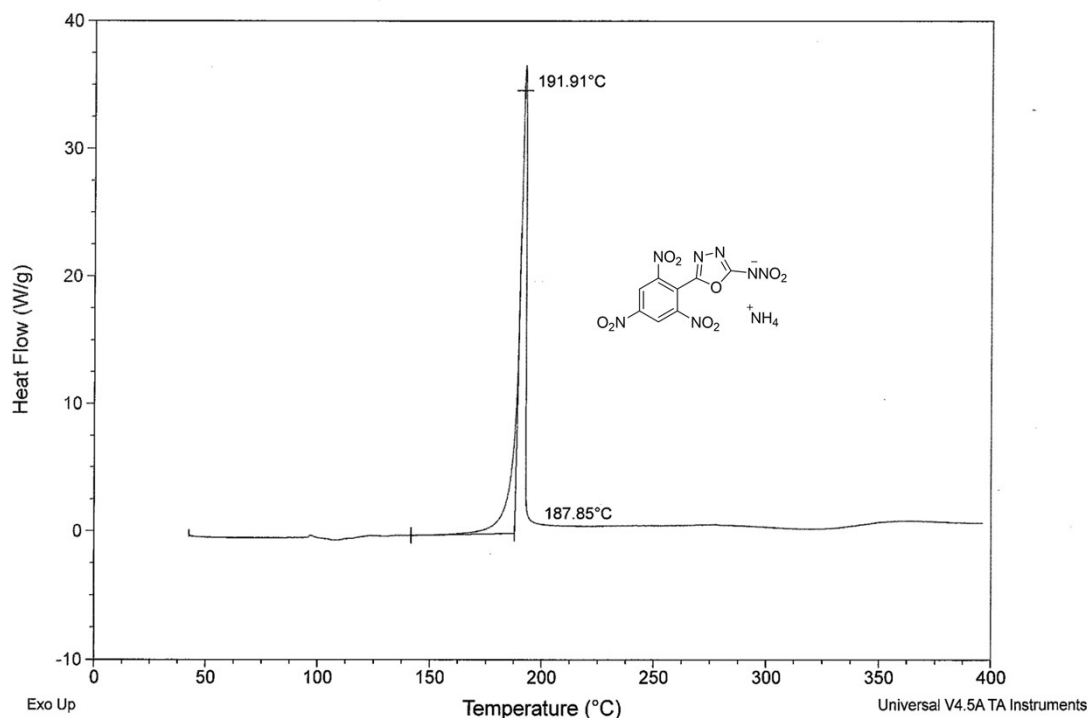

Figure S9 DSC plot of 4.

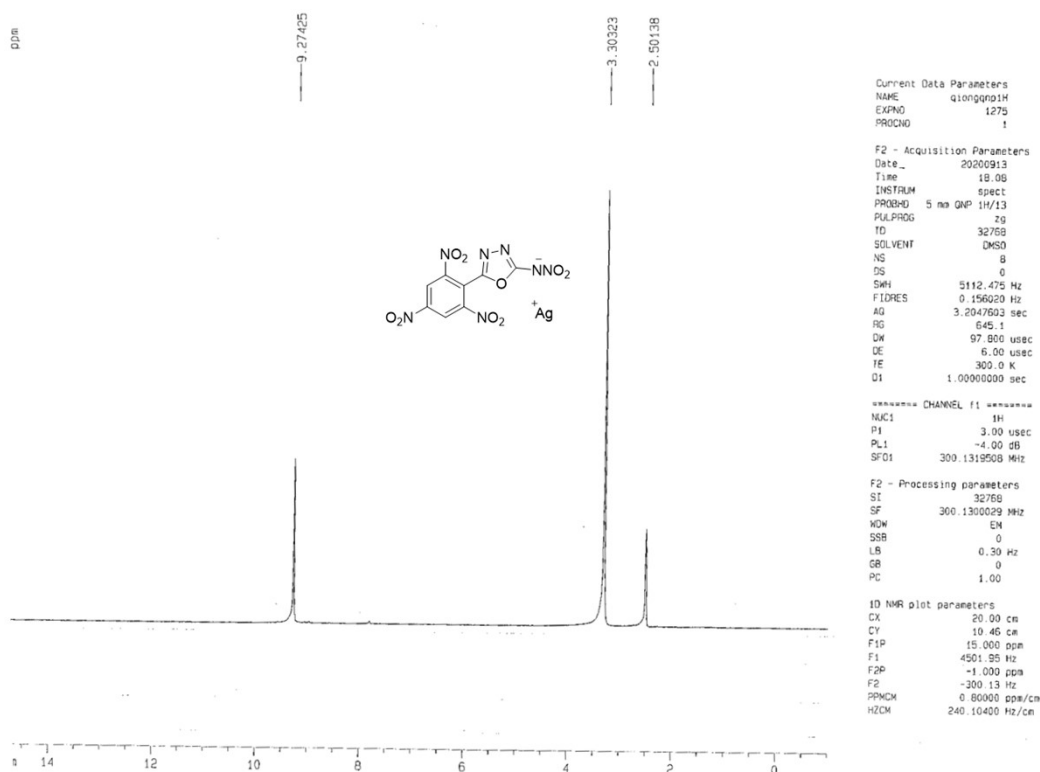

Figure S10 <sup>1</sup>H-NMR spectrum of 5 in *d*<sub>6</sub>-DMSO.

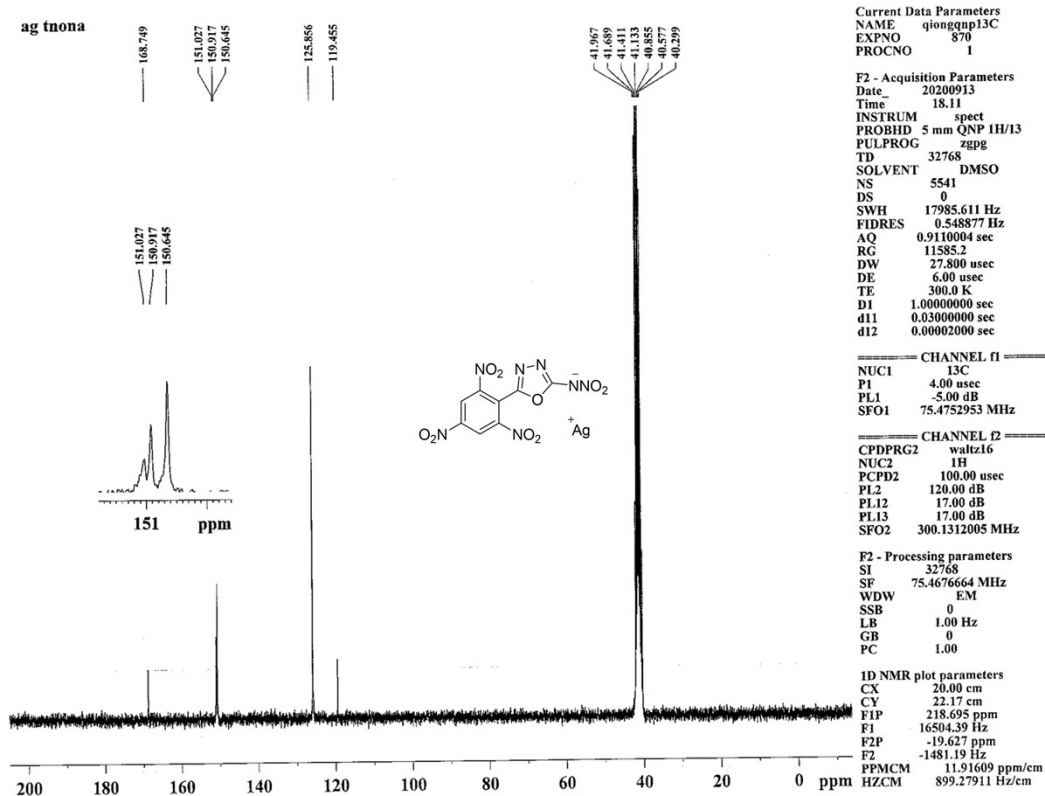

Figure S11  $^{13}\text{C}$ -NMR spectrum of **5** in  $d_6$ -DMSO.

Sample: ag tnona ea  
 Size: 0.6000 mg  
 Method: Ramp  
 Comment: Cell constant calibration

DSC

File: C:\...ag tnona ea washed.001  
 Operator: qiong  
 Run Date: 13-Sep-2020 20:54  
 Instrument: DSC Q2000 V24.11 Build 124

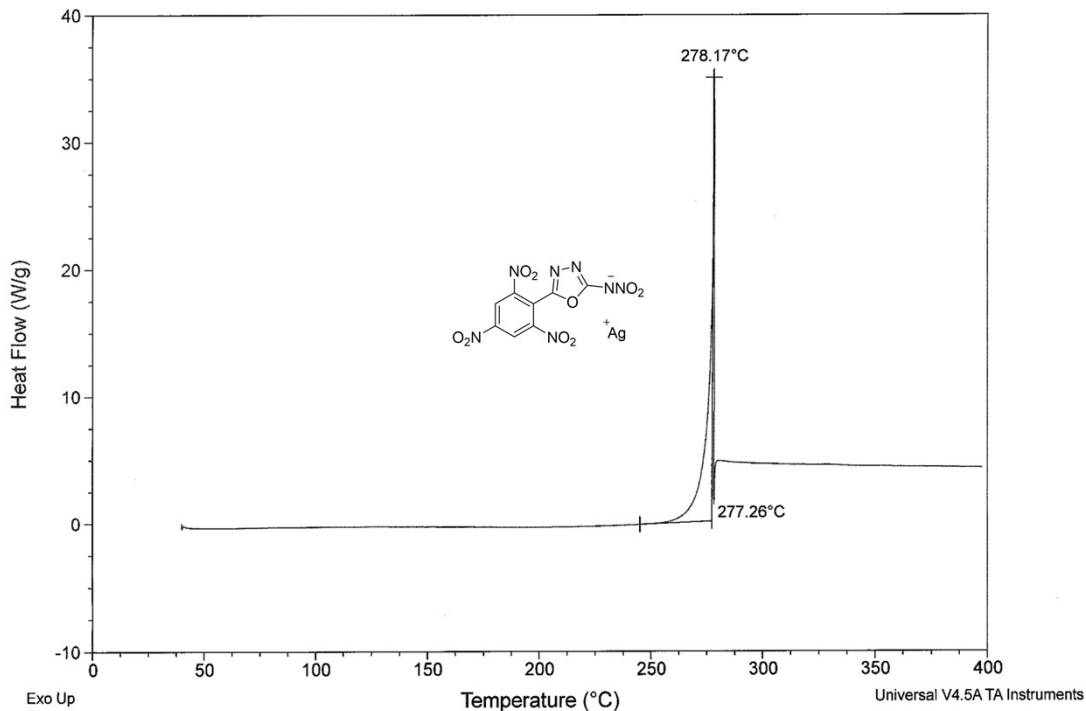

Figure S12 DSC plot of **5**.



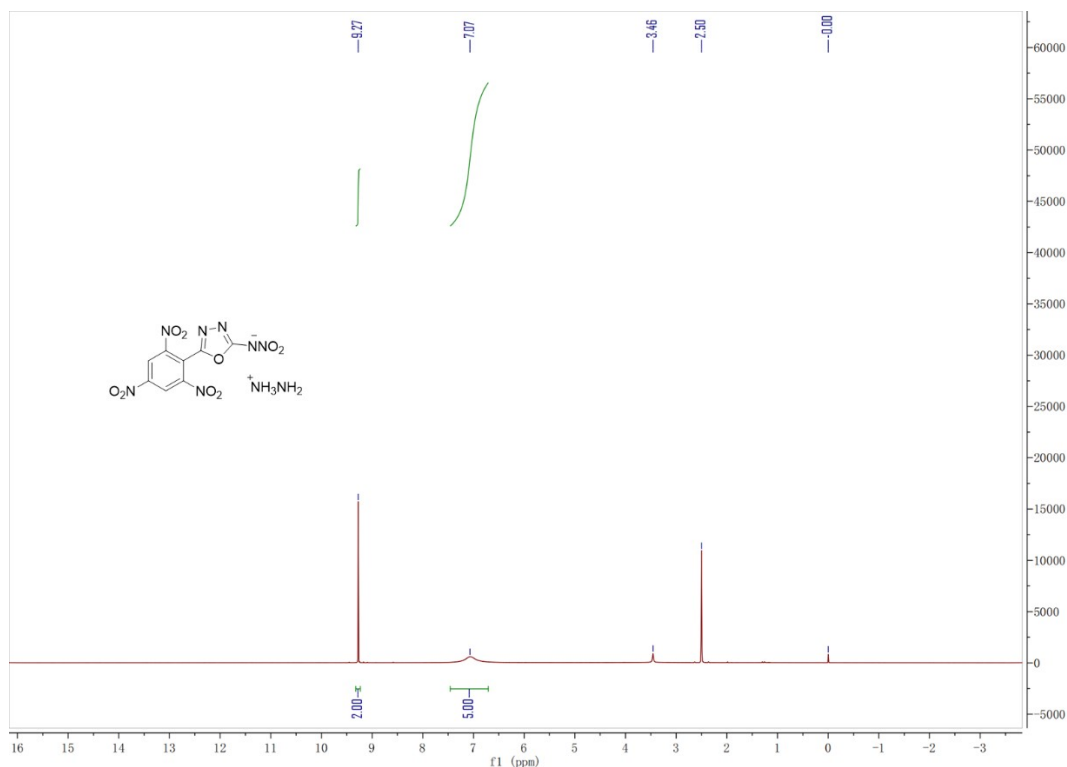

Figure S13  $^1\text{H}$ -NMR spectrum of 6a in  $d_6$ -DMSO.

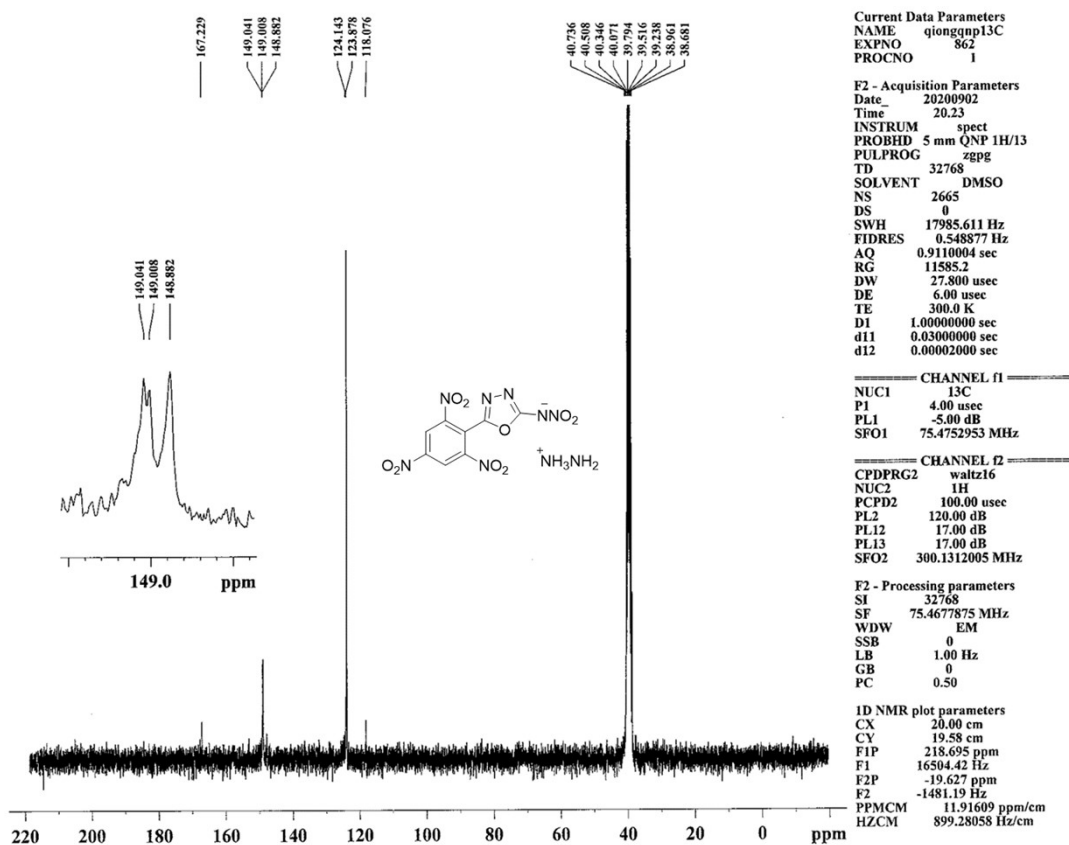

Figure S14  $^{13}\text{C}$ -NMR spectrum of 6a in  $d_6$ -DMSO.

Sample: n2h5 tnona 2  
Size: 0.5000 mg  
Method: Ramp  
Comment: Cell constant calibration

DSC

File: C:\...trinitro toluene\n2h5 tnona 2.001  
Operator: qjong  
Run Date: 13-Sep-2020 22:23  
Instrument: DSC Q2000 V24.11 Build 124

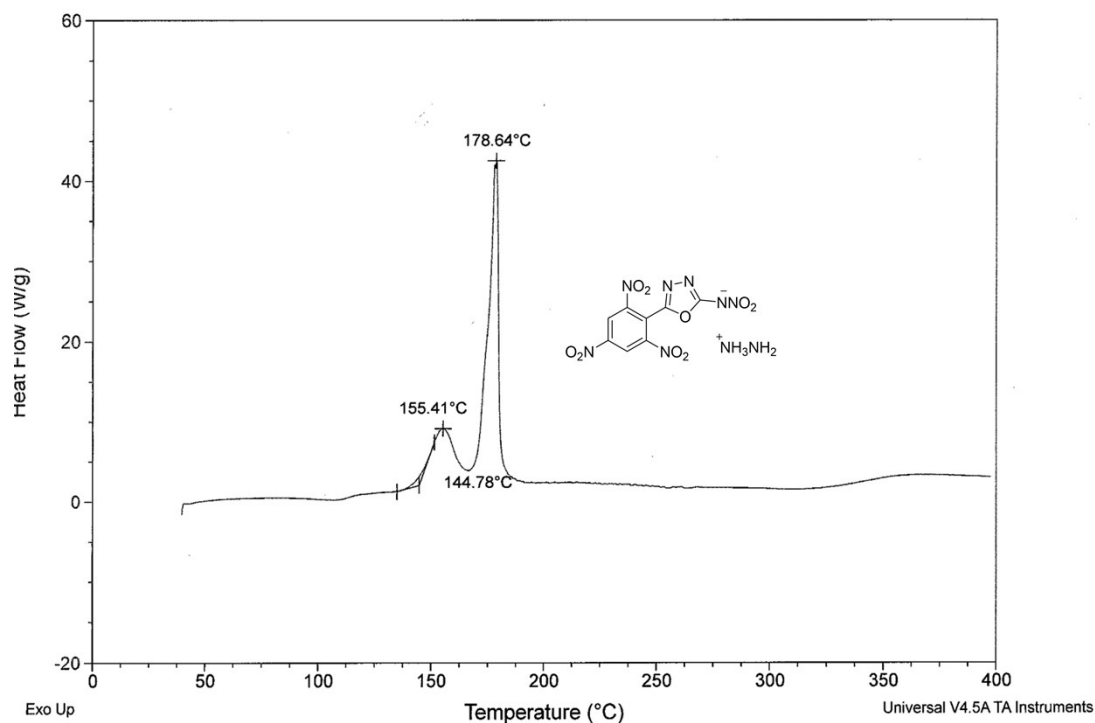

Figure S15 DSC plot of 6a.

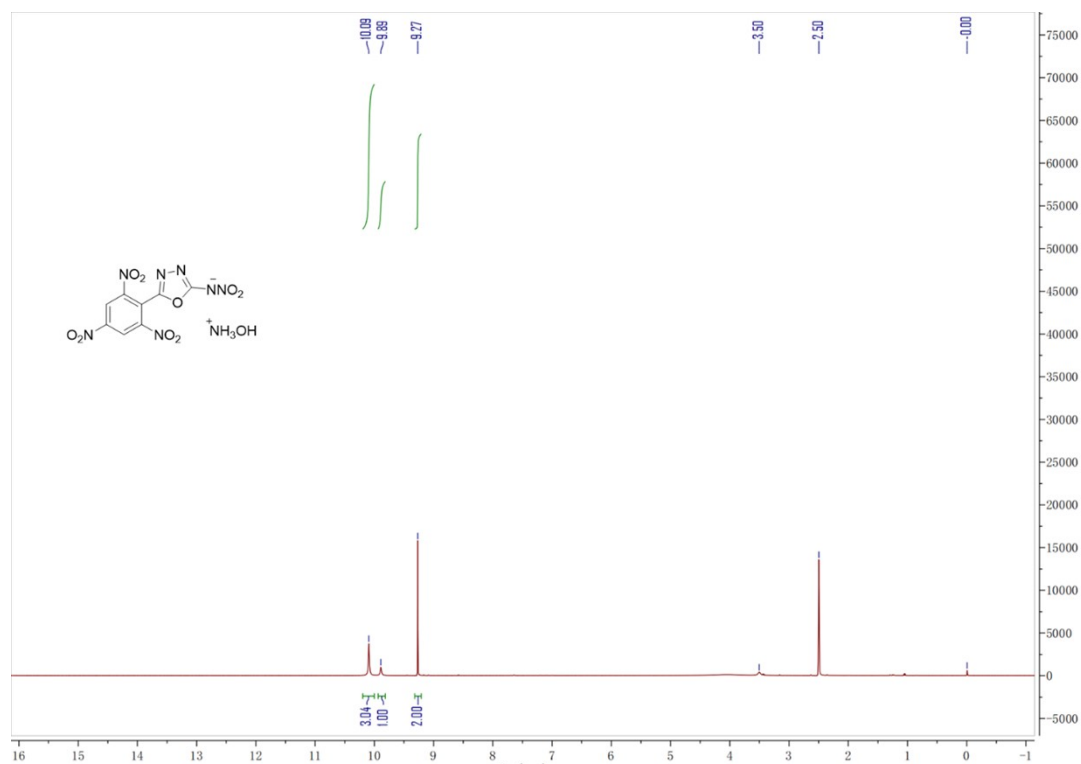

Figure S16  $^1\text{H-NMR}$  spectrum of 6b in  $d_6$ -DMSO.

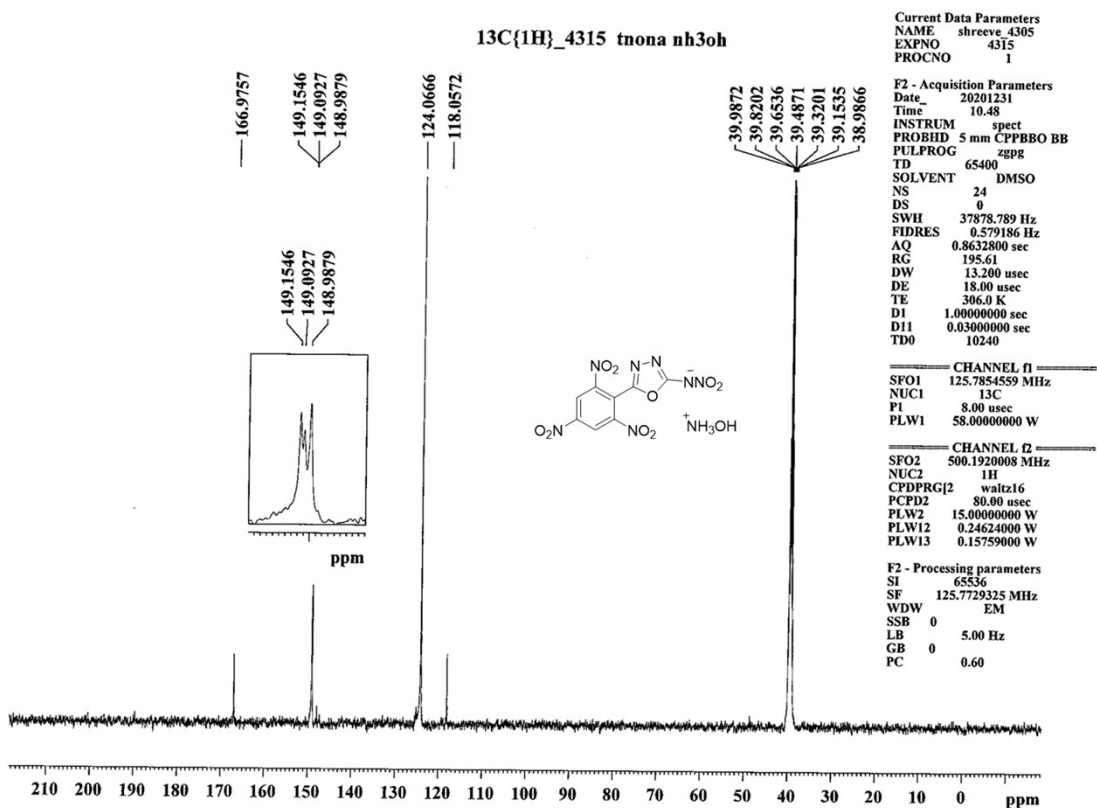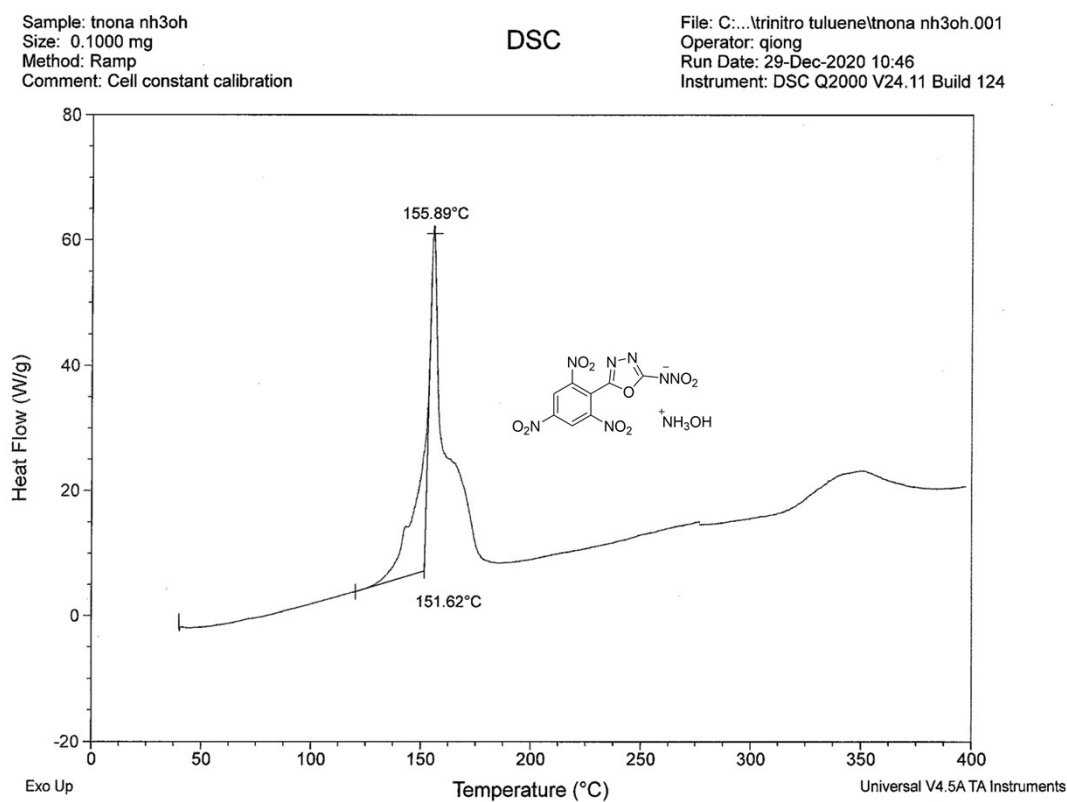

## References

- 1 M. J. Frisch; G. W. Trucks; H. G. Schlegel; G. E. Scuseria; M. A. Robb; J. R. Cheeseman; G. Scalmani; V. Barone; G. A. Petersson; H. Nakatsuji; X. Li; M. Caricato; V. Marenich; J. Bloino; B. G. Janesko; R. Gomperts; B. Mennucci; H. P. Hratchian; J. V. Ortiz; A. F. Izmaylov; J. L. Sonnenberg; D. Williams; F. Ding; F. Lipparini; F. Egid; J. Goings; Peng J. L.B.; A. Petrone; T. Henderson; D. Ranasinghe; V. G. Zakrzewski; J. Gao; N. Rega; G. Zheng; W. Liang; M. Hada; M. Ehara; K. Toyota; R. Fukuda; J. Hasegawa; M. Ishida; T. Nakajima; Y. Honda; O. Kitao; H. Nakai; T. Vreven; K. Throssell; J. A. Montgomery; J. E. Peralta; F. Ogliaro; M. J. Bearpark; J. J. Heyd; E. N. Brothers; K. N. Kudin; V. N. Staroverov; T. A. Keith; R. Kobayashi; J. Normand; K. Raghavachari; A. P. Rendell; J. C. Burant; S. S. Iyengar; J. Tomasi; M. Cossi; J. M. Millam; M. Klene; C. Adamo; R. Cammi; J. W. Ochterski.; R. L. Martin; K. Morokuma; O. Farka; J. B. Foresman; D. J. Fox; Gaussian 16, Revision A.03, Wallingford, CT 2016.
- 2 J. M. Martin, Ab initio total atomization energies of small molecules-towards the basis set limit. *Chem. Phys. Lett.* 1996, **259**, 669-678.
